# Supplementary material for: Biomarkers of Response to Etoposide-Platinum Chemotherapy in Patients with Grade 3 Neuroendocrine Neoplasms
Source: PubMed Central journal article supplement (PMC7915900; doi:10.3390/cancers13040643), 2021-02-05
Supplement: cancers-13-00643-s001.pdf [file cancers-13-00643-s001.pdf]

**Figure S1.** Study flowchart of the study.

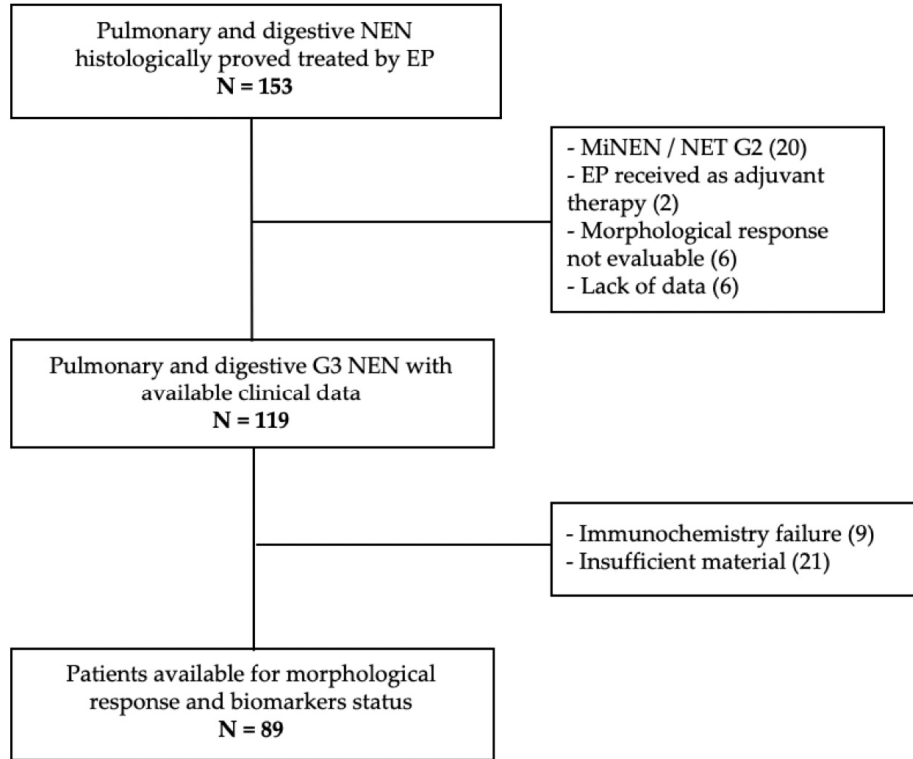

**Figure S2.** Distribution of the Rb score, according to NEN classification and RECIST-defined objective response to EP chemotherapy.

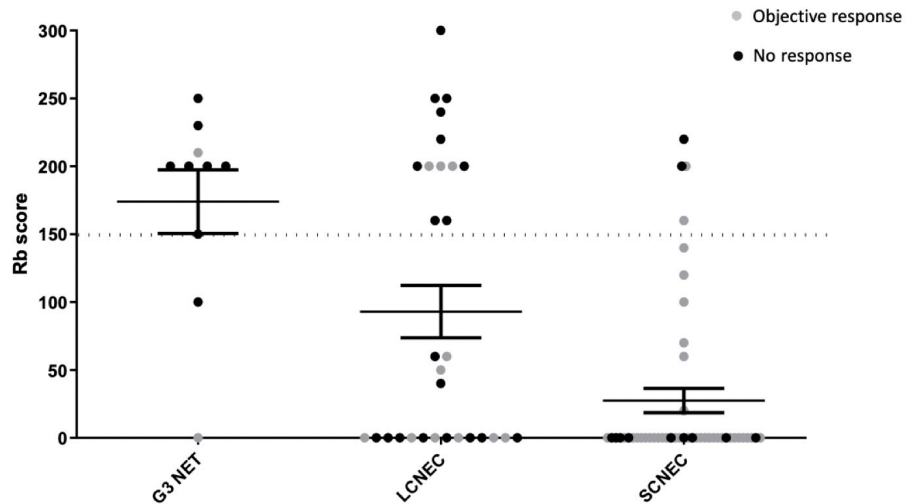

**Table S1.** Pathological characteristics according to the primary NEN.

|                                     | <b>Lung NEN</b>  | <b>Digestive NEN</b> |
|-------------------------------------|------------------|----------------------|
| Total, n (%)                        | 37 (41.6)        | 52 (58.4)            |
| 2017-2019 WHO classification, n (%) |                  |                      |
| G3 NET                              | 0                | 10 (100)             |
| LCNEC                               | 7 (22.6)         | 24 (77.4)            |
| SCNEC                               | 30 (62.5)        | 18 (37.5)            |
| Ki67 (%), median (IQR)              | 90.0 (80.0-92.5) | 70.0 (39.0-90.0)     |
| Biomarker expression, n (%)         |                  |                      |
| Rb <sup>inap</sup>                  | 29 (78.3)        | 22 (44.0)            |
| Rb<150                              | 33 (89.1)        | 30 (60.0)            |
| p16 <sup>high</sup>                 | 31 (86.1)        | 25 (49.0)            |
| p53 <sup>inap</sup>                 | 25 (67.6)        | 28 (57.1)            |

**Table S2.** Treatment toxicity.

| <b>n (%)</b>           | <b>Grade 3-4</b> |
|------------------------|------------------|
| Fatigue*               | 7 (11.1)         |
| Nausea and vomiting**  | 0 (0)            |
| Neuropathy sensory**   | 4 (4.9)          |
| Acute renal failure*** | 0 (0)            |
| Leukopenia****         | 12 (13.9)        |
| Neutropenia****        | 27 (31.4)        |
| Thrombocytopenia****   | 7 (8.1)          |
| Anemia****             | 8 (9.3)          |
